# Supplementary material
Source: PubMed Central journal article supplement (PMC7899134)
Supplement: NIHMS1665338-supplement-8.pdf [file NIHMS1665338-supplement-8.pdf]

**Table S1. Crystallographic Data and Refinement Statistics. Related to Figure 1.**

|                                                                                                     | <b>IL-23<br/>complex</b>                 | <b>IL-12R<math>\beta</math>1</b> | <b>IL-12R<math>\beta</math>1 (SeMet)</b> |                       |                       |
|-----------------------------------------------------------------------------------------------------|------------------------------------------|----------------------------------|------------------------------------------|-----------------------|-----------------------|
| <b>Dataset</b>                                                                                      | native                                   | native                           | peak                                     | remote                | inflection            |
| <b>Wavelength (Å)</b>                                                                               | 1.0000                                   | 1.0000                           | 0.9792                                   | 0.9184                | 0.9798                |
| <b>Resolution<br/>range</b>                                                                         | 46.54-3.401<br>(3.522-3.401)             | 36.19-2.01<br>(2.082-2.01)       | 47.4-2.5<br>(2.6-2.5)                    | 47.4-2.5<br>(2.6-2.5) | 47.4-2.5<br>(2.6-2.5) |
| <b>Space group</b>                                                                                  | P 2 21 21                                | P 43 21 2                        |                                          |                       |                       |
| <b>Unit cell (a, b, c,<br/><math>\alpha</math>, <math>\beta</math>, <math>\gamma</math>) (Å, °)</b> | 75.712<br>118.483<br>186.151<br>90 90 90 | 55.78 55.78 182.01 90 90 90      |                                          |                       |                       |
| <b>Total reflections</b>                                                                            | 58906 (5984)                             | 218632<br>(16685)                | 131570<br>(14869)                        | 132076<br>(14417)     | 132235<br>(14962)     |
| <b>Unique<br/>reflections</b>                                                                       | 21806 (2240)                             | 19869 (1861)                     | 10619 (1159)                             | 10618 (1152)          | 10638 (1161)          |
| <b>Multiplicity</b>                                                                                 | 2.7 (2.7)                                | 11.0 (9.0)                       | 12.4 (12.8)                              | 12.4 (12.5)           | 12.4 (12.9)           |
| <b>Completeness<br/>(%)</b>                                                                         | 89.67 (75.95)                            | 98.84 (94.03)                    | 99.9 (99.4)                              | 99.7 (98.7)           | 99.9 (99.6)           |
| <b>Mean I/sigma(I)</b>                                                                              | 8.59 (0.57)                              | 13.80 (1.16)                     | 26.3 (3.1)                               | 25.4 (2.7)            | 26.3 (2.7)            |
| <b>R-merge</b>                                                                                      | 0.07234<br>(2.118)                       | 0.1033 (1.685)                   | 0.067 (0.840)                            | 0.073 (0.964)         | 0.069 (0.967)         |
| <b>R-meas</b>                                                                                       | 0.0888 (2.602)                           | 0.1084 (1.789)                   | 0.073 (0.908)                            | 0.079 (1.044)         | 0.074 (1.044)         |
| <b>R-pim</b>                                                                                        | 0.0506 (1.484)                           | 0.032 (0.5814)                   | 0.027 (0.341)                            | 0.030 (0.398)         | 0.028 (0.391)         |
| <b>CC1/2</b>                                                                                        | 0.999 (0.286)                            | 0.999 (0.438)                    | 0.999 (0.824)                            | 0.999 (0.761)         | 1.000 (0.783)         |
| <b>Reflections<br/>used in<br/>refinement</b>                                                       | 21297 (1768)                             | 19820 (1844)                     |                                          |                       |                       |
| <b>Reflections<br/>used for R-free</b>                                                              | 1948 (158)                               | 992 (94)                         |                                          |                       |                       |
| <b>R-work</b>                                                                                       | 0.2384<br>(0.4134)                       | 0.2207<br>(0.3375)               |                                          |                       |                       |
| <b>R-free</b>                                                                                       | 0.2943<br>(0.4067)                       | 0.2419<br>(0.3287)               |                                          |                       |                       |

|                                     |        |       |
|-------------------------------------|--------|-------|
| <b>Number of non-hydrogen atoms</b> | 6847   | 1696  |
| <b>macromolecules</b>               | 6709   | 1634  |
| <b>ligands</b>                      | 137    | 23    |
| <b>solvent</b>                      | 1      | 39    |
| <b>Protein residues</b>             | 852    | 212   |
| <b>RMS(bonds)</b>                   | 0.003  | 0.011 |
| <b>RMS(angles)</b>                  | 0.56   | 1.14  |
| <b>Ramachandran favored (%)</b>     | 94.38  | 97.12 |
| <b>Ramachandran allowed (%)</b>     | 5.62   | 2.88  |
| <b>Ramachandran outliers (%)</b>    | 0.00   | 0.00  |
| <b>Rotamer outliers (%)</b>         | 0.00   | 1.15  |
| <b>Clashscore</b>                   | 5.02   | 2.48  |
| <b>Average B-factor</b>             | 157.34 | 48.77 |
| <b>macromolecules</b>               | 156.30 | 48.62 |
| <b>ligands</b>                      | 208.71 | 64.78 |
| <b>solvent</b>                      | 95.66  | 45.72 |
| <b>Number of TLS groups</b>         | 4      | 8     |

**Table S2. Quaternary IL-23 receptor complex interatomic contacts. Related to Figure 1.**

Summary of IL-23 receptor contacts from PISA (Krissinel and Henrick, 2007). Abbreviations as follows: vdw, van der Waals; hb, hydrogen bond; sb, salt bridge; sc, side chain; mc main chain.

P40-IL12R $\beta$ 1 contacts

| <b>P40 residue</b> | <b>IL12R<math>\beta</math>1 residue</b> | <b>Type</b> | <b>Mainchain/sidechain</b> |
|--------------------|-----------------------------------------|-------------|----------------------------|
| Trp 37             | Leu 108                                 | vdw         | sc-sc                      |
| Pro 39             | Asn 135                                 | vdw         | sc-sc                      |
|                    | Tyr 134                                 | vdw         | sc-sc                      |
| Asp 40             | Leu 108                                 | hb          | mc-mc                      |
|                    | Gln 132                                 | hb          | sc-sc                      |
| Ala 41             | Tyr 109                                 | hb          | sc-sc                      |
| Lys 80             | Tyr 109                                 | hb          | mc-sc                      |
| Glu 81             | Ser 106                                 | vdw         | sc-sc                      |
| Phe 82             | Asp 101                                 | vdw         | sc-mc                      |
|                    | Gln 102                                 | vdw         | sc-sc                      |
| Glu 108            | Tyr 134                                 | vdw         | sc-sc                      |
|                    |                                         | hb          | sc-sc                      |
| Asp 115            | Asp 58                                  | vdw         | sc-sc                      |
| His 216            | Gln 102                                 | hb          | mc-sc                      |
|                    |                                         |             | sc-sc                      |
| Lys 217            | Gln 102                                 | hb          | sc-mc                      |
| Lys 217            | Gln 102                                 | hb          | mc-sc                      |

|         |         |     |       |
|---------|---------|-----|-------|
|         | Glu 24  | sb  | SC-SC |
| Leu 218 | Gln 102 | hb  | mc-sc |
| Lys 219 | Asp 58  | hb  | SC-SC |
|         | Asp 101 | hb  | SC-SC |
|         | Gln 102 | vdw | SC-SC |

#### P40-IL23R contacts

| P40 residue | IL23R residue | Type | Mainchain/sidechain |
|-------------|---------------|------|---------------------|
| Asp 109     | Gln 60        | hb   | mc-sc               |
| Gly 110     | Gln 60        | vdw  | mc-mc               |
| Pro 123     | Phe 109       | vdw  | SC-SC               |
| Lys 124     | Phe 109       | hb   | sc-mc               |

#### IL-23p19-IL23R contacts

| P19 residue | IL23R residue | Type  | Mainchain/sidechain |
|-------------|---------------|-------|---------------------|
| His 53      | Lys 124       | hb    | mc-sc               |
| Leu 56      | Glu 111       | vdw   | mc-mc               |
|             | Tyr 100       | vdw   | SC-SC               |
|             | Thr 102       | vdw   | SC-SC               |
| Arg 57      | His 108       | pi-pi | SC-SC               |
|             | Gln 110       | vdw   | SC-SC               |
|             | Glu 111       | hb    | mc-mc               |
|             | Leu 113       | hb    | mc-mc               |
| Glu 59      | Ser 31        | vdw   | SC-SC               |
| Val 68      | Ile 25        | vdw   | SC-SC               |

|         |         |       |       |
|---------|---------|-------|-------|
| Pro 155 | Asp 118 | vdw   | mc-sc |
| Trp 156 | Gly 116 | pi-pi | sc-mc |
|         | Lys 117 | pi-pi | sc-mc |
|         | Asp 118 | vdw   | mc-sc |
|         |         |       |       |
|         |         | hb    | mc-sc |
| Leu 160 | Leu 113 | vdw   | sc-sc |
|         | Tyr 100 | vdw   | sc-sc |
| Leu 161 | Ile 28  | vdw   | sc-sc |
| Lys 164 | Gly 24  | hb    | sc-mc |
| Ala 171 | Arg 230 | vdw   | sc-sc |
| Phe 172 | Glu 203 | vdw   | mc-sc |
| Ala 174 | Tyr 314 | vdw   | sc-mc |
| Val 175 | Ala 201 | vdw   | sc-mc |
| Ala 177 | Tyr 314 | pi-pi | mc-sc |
| Arg 178 | Tyr 268 | vdw   | sc-sc |
|         | Asp 312 | hb    | sc-sc |
|         | Tyr 136 | hb    | sc-sc |
| Val 179 | Tyr 268 | vdw   | sc-sc |
| Ala 181 | Ser 267 | vdw   | mc-mc |
| His 182 | Ser 267 | hb    | sc-sc |

**Table S3. Cryo-Electron Microscopy data collection and processing statistics.  
Related to Figure 3.**

|                                                                  | <b>IL-23 complex</b> | <b>IL-12 complex</b> |
|------------------------------------------------------------------|----------------------|----------------------|
| <b>Voltage (kV)</b>                                              | 300                  | 300                  |
| <b>Magnification (calibrated)</b>                                | 58,824               | 58,824               |
| <b>Defocus (<math>\mu\text{m}</math>)</b>                        | -1.5 to -2.4         | -1.5 to -2.4         |
| <b>Pixel size (<math>\text{\AA}</math>)</b>                      | 0.8521               | 0.8521               |
| <b>Total electron dose (electrons/<math>\text{\AA}^2</math>)</b> | 44                   | 62                   |
| <b>Exposure time (s)</b>                                         | 2                    | 4                    |
| <b>No. of images</b>                                             | 946                  | 1581                 |
| <b>No. of frames per image</b>                                   | 40                   | 57                   |
| <b>Initial particle number</b>                                   | 488,577              | 120,293              |
| <b>Particle number for 3D classification</b>                     | 95,228               | 22,764               |
| <b>Final particle number</b>                                     | 33,138               | 11,646               |
| <b>Resolution (<math>\text{\AA}</math>)</b>                      | 8.0                  | 10.0                 |
| <b>Map sharpened B-factor (<math>\text{\AA}^2</math>)</b>        | 300                  | 300                  |
